# Supplementary material for: Maternal, dominance and additive genetic effects in Nile tilapia; influence on growth, fillet yield and body size traits
Source: PubMed Central journal article supplement (PMC5889400; doi:10.1038/s41437-017-0046-x), 2018-01-16
Supplement: 41437_2017_46_MOESM3_ESM.pdf [file 41437_2017_46_MOESM3_ESM.pdf]

Supplement Information 3

## Maternal, dominance and additive genetic effects in Nile tilapia; influence on growth, fillet yield and body size traits

**R Joshi<sup>1</sup>, JA Woolliams<sup>1,2</sup>, THE Meuwissen<sup>1</sup> and HM Gjøen<sup>1</sup>**

<sup>1</sup>Department of Animal and Aquacultural Sciences, Norwegian University of Life Sciences, 1432 Ås, Norway

<sup>2</sup> The Roslin Institute, Royal (Dick) School of Veterinary Studies, University of Edinburgh, Easter Bush, Midlothian, EH25 9RG, United Kingdom

Supplementary 3: Tables of variance component estimates for all the models

Table S3.1: Heritabilities for different models and different traits (standard errors are inside parenthesis). Values of 0 for component indicate estimate was bound to zero.

| Trait | Model  | Variance parameters |             |             |             |             | Ratios         |                |                |
|-------|--------|---------------------|-------------|-------------|-------------|-------------|----------------|----------------|----------------|
|       |        | Additive            | Dominance   | Maternal    | Residual    | Phenotypic  | h <sup>2</sup> | d <sup>2</sup> | m <sup>2</sup> |
| BD    | A      | 0.26 [0.08]         | -           | -           | 0.32 [0.04] | 0.58 [0.04] | 0.44 [0.1]     | -              | -              |
|       | AD     | 0.15 [0.1]          | 0.15 [0.09] | -           | 0.27 [0.05] | 0.57 [0.04] | 0.27 [0.15]    | 0.26 [0.15]    | -              |
|       | ADM    | 0 [0]               | 0.14 [0.05] | 0.05 [0.02] | 0.35 [0.04] | 0.53 [0.03] | 0 [0]          | 0.26 [0.09]    | 0.09 [0.04]    |
|       | AM     | 0.09 [0.04]         | -           | 0.05 [0.02] | 0.4 [0.02]  | 0.54 [0.03] | 0.17 [0.07]    | -              | 0.09 [0.04]    |
|       | A*     | 0.24 [0.07]         | -           | -           | 0.32 [0.04] | 0.56 [0.04] | 0.43 [0.1]     |                |                |
|       | A*D*   | 0.16 [0.08]         | 0.13 [0.08] | -           | 0.26 [0.05] | 0.55 [0.04] | 0.29 [0.13]    | 0.24 [0.14]    |                |
|       | A*D*M* | 0 [0]               | 0.14 [0.05] | 0.05 [0.02] | 0.33 [0.04] | 0.52 [0.03] | 0 [0]          | 0.27 [0.09]    | 0.09 [0.04]    |
|       | A*M*   | 0.08 [0.04]         | -           | 0.05 [0.02] | 0.40 [0.02] | 0.53 [0.03] | 0.16 [0.07]    | -              | 0.09 [0.04]    |
|       | S      | 0.12 [0.04]         | -           | -           | 0.44 [0.01] | 0.47 [0.02] | 0.25 [0.07]    | -              |                |
|       | SF     | 0.11 [0.04]         | 0.03 [0.02] | -           | 0.44 [0.01] | 0.50 [0.02] | 0.23 [0.06]    | 0.07 [0.04]    |                |
|       | SFM    | 0.03 [0.02]         | 0.04 [0.02] | 0.05 [0.02] | 0.44 [0.01] | 0.51 [0.03] | 0.07 [0.04]    | 0.07 [0.04]    | 0.09 [0.04]    |
|       | SM     | 0.04 [0.02]         | -           | 0.05 [0.02] | 0.44 [0.01] | 0.51 [0.03] | 0.08 [0.04]    | -              | 0.09 [0.04]    |
|       |        |                     |             |             |             |             |                |                |                |
| Trait | Model  | Variance parameters |             |             |             |             | Ratios         |                |                |
|       |        | Additive            | Dominance   | Maternal    | Residual    | Phenotypic  | h <sup>2</sup> | d <sup>2</sup> | m <sup>2</sup> |
| BL    | A      | 0.97 [0.31]         | -           | -           | 2.33 [0.17] | 3.29 [0.18] | 0.29 [0.08]    | -              | -              |
|       | AD     | 0.74 [0.43]         | 0.33 [0.45] | -           | 2.2 [0.24]  | 3.27 [0.18] | 0.23 [0.12]    | 0.1 [0.14]     | -              |
|       | ADM    | 0.30 [0.4]          | 0.36 [0.46] | 0.12 [0.09] | 2.39 [0.22] | 3.17 [0.15] | 0.09 [0.12]    | 0.12 [0.14]    | 0.04 [0.03]    |
|       | AM     | 0.55 [0.26]         | -           | 0.12 [0.09] | 2.52 [0.15] | 3.19 [0.15] | 0.17 [0.08]    | -              | 0.04 [0.03]    |
|       | A*     | 0.90 [0.29]         |             |             | 2.33 [0.17] | 3.23 [0.16] | 0.28 [0.08]    |                |                |
|       | A*D*   | 0.74 [0.37]         | 0.28 [0.39] |             | 2.19 [0.26] | 3.21 [0.17] | 0.23 [0.11]    | 0.09 [0.12]    |                |
|       | A*D*M* | 0.32 [0.34]         | 0.32 [0.4]  | 0.12 [0.09] | 2.36 [0.24] | 3.12 [0.15] | 0.10 [0.11]    | 0.10 [0.13]    | 0.04 [0.03]    |
|       | A*M*   | 0.52 [0.25]         |             | 0.12 [0.09] | 2.52 [0.15] | 3.15 [0.14] | 0.16 [0.07]    |                | 0.04 [0.03]    |
|       | S      | 0.45 [0.15]         |             |             | 2.78 [0.08] | 3.00 [0.11] | 0.15 [0.05]    |                |                |
|       | SF     | 0.44 [0.15]         | 0.07 [0.1]  |             | 2.77 [0.08] | 3.00 [0.11] | 0.15 [0.05]    | 0.02 [0.03]    |                |

|              |              |                            |                  |                 |                 |                   |                      |                      |                      |
|--------------|--------------|----------------------------|------------------|-----------------|-----------------|-------------------|----------------------|----------------------|----------------------|
|              | SFM          | 0.24 [0.12]                | 0.08 [0.1]       | 0.12 [0.09]     | 2.76 [0.08]     | 3.02 [0.12]       | 0.08 [0.04]          | 0.03 [0.03]          | 0.04 [0.03]          |
|              | SM           | 0.26 [0.12]                |                  | 0.12 [0.09]     | 2.78 [0.08]     | 3.02 [0.12]       | 0.09 [0.04]          |                      | 0.04 [0.03]          |
| <b>Trait</b> | <b>Model</b> | <b>Variance parameters</b> |                  |                 |                 |                   | <b>Ratios</b>        |                      |                      |
|              |              | <b>Additive</b>            | <b>Dominance</b> | <b>Maternal</b> | <b>Residual</b> | <b>Phenotypic</b> | <b>h<sup>2</sup></b> | <b>d<sup>2</sup></b> | <b>m<sup>2</sup></b> |
| <b>BT</b>    | A            | 1.97 [0.69]                | -                | -               | 7.44 [0.41]     | 9.41 [0.43]       | 0.21 [0.07]          | -                    | -                    |
|              | AD           | 0.96 [1.13]                | 1.51 [1.36]      | -               | 6.86 [0.65]     | 9.34 [0.43]       | 0.10 [0.12]          | 0.16 [0.15]          | -                    |
|              | ADM          | 0 [0]                      | 1.53 [0.7]       | 0.29 [0.2]      | 7.3 [0.54]      | 9.12 [0.35]       | 0 [0]                | 0.17 [0.07]          | 0.03 [0.02]          |
|              | AM           | 1.05 [0.56]                | -                | 0.28 [0.2]      | 7.87 [0.36]     | 9.20 [0.38]       | 0.11 [0.06]          | -                    | 0.03 [0.02]          |
|              | A*           | 1.85 [0.65]                |                  |                 | 7.44 [0.41]     | 9.29 [0.39]       | 0.20 [0.06]          |                      |                      |
|              | A*D*         | 1.08 [0.93]                | 1.32 [1.19]      |                 | 6.77 [0.72]     | 9.17 [0.4]        | 0.12 [0.1]           | 0.14 [0.13]          |                      |
|              | A*D*M*       | 0.07 [0.84]                | 1.48 [1.22]      | 0.30 [0.2]      | 7.15 [0.69]     | 8.99 [0.36]       | 0.01 [0.1]           | 0.16 [0.14]          | 0.03 [0.02]          |
|              | A*M*         | 0.98 [0.53]                |                  | 0.28 [0.2]      | 7.87 [0.36]     | 9.13 [0.36]       | 0.11 [0.06]          |                      | 0.03 [0.02]          |
|              | S            | 0.92 [0.32]                |                  |                 | 8.36 [0.24]     | 8.83 [0.28]       | 0.10 [0.03]          |                      |                      |
|              | SF           | 0.87 [0.32]                | 0.33 [0.3]       |                 | 8.3 [0.24]      | 8.82 [0.28]       | 0.10 [0.04]          | 0.04 [0.03]          |                      |
|              | SFM          | 0.40 [0.26]                | 0.37 [0.3]       | 0.30 [0.2]      | 8.29 [0.24]     | 8.88 [0.31]       | 0.05 [0.03]          | 0.04 [0.03]          | 0.03 [0.02]          |
| SM           | 0.49 [0.26]  |                            | 0.28 [0.2]       | 8.36 [0.24]     | 8.89 [0.31]     | 0.06 [0.03]       |                      | 0.03 [0.02]          |                      |
| <b>Trait</b> | <b>Model</b> | <b>Variance parameters</b> |                  |                 |                 |                   | <b>Ratios</b>        |                      |                      |
|              |              | <b>Additive</b>            | <b>Dominance</b> | <b>Maternal</b> | <b>Residual</b> | <b>Phenotypic</b> | <b>h<sup>2</sup></b> | <b>d<sup>2</sup></b> | <b>m<sup>2</sup></b> |
| <b>BWH</b>   | A            | 3216 [989]                 | -                | -               | 4312 [496]      | 7528 [546]        | 0.43 [0.1]           | -                    | -                    |
|              | AD           | 2085 [1219]                | 1688 [1090]      | -               | 3673 [636]      | 7447 [543]        | 0.28 [0.15]          | 0.23 [0.15]          | -                    |
|              | ADM          | 0 [0]                      | 1548 [614]       | 637 [313]       | 4739 [450]      | 6925 [381]        | 0 [0]                | 0.22 [0.08]          | 0.09 [0.04]          |
|              | AM           | 1008 [492]                 | -                | 635 [316]       | 5342 [287]      | 6986 [405]        | 0.14 [0.07]          | -                    | 0.09 [0.04]          |
|              | A*           | 3006 [925]                 |                  |                 | 4320 [495]      | 7326 [487]        | 0.41 [0.1]           |                      |                      |
|              | A*D*         | 2149 [1069]                | 1475 [953]       |                 | 3575 [680]      | 7200 [488]        | 0.30 [0.13]          | 0.20 [0.13]          |                      |
|              | A*D*M*       | 0 [0]                      | 1557 [597]       | 644 [313]       | 4579 [494]      | 6780 [361]        | 0 [0]                | 0.23 [0.09]          | 0.10 [0.04]          |
|              | A*M*         | 943 [460]                  |                  | 636 [316]       | 5344 [287]      | 6923 [391]        | 0.14 [0.06]          |                      | 0.09 [0.04]          |
|              | S            | 1503 [462]                 |                  |                 | 5822 [165]      | 6573 [281]        | 0.23 [0.06]          |                      |                      |
|              | SF           | 1443 [461]                 | 369 [238]        |                 | 5756 [165]      | 6570 [280]        | 0.22 [0.06]          | 0.06 [0.04]          |                      |
|              | SFM          | 378 [222]                  | 402 [243]        | 746 [315]       | 5745 [166]      | 6681 [354]        | 0.06 [0.03]          | 0.06 [0.04]          | 0.10 [0.04]          |
| SM           | 4712 [231]   |                            | 736 [316]        | 5816 [165]      | 6687 [355]      | 0.07 [0.03]       |                      | 0.10 [0.04]          |                      |

| Trait | Model  | Variance parameters |           |             |             |             | Ratios         |                |                |
|-------|--------|---------------------|-----------|-------------|-------------|-------------|----------------|----------------|----------------|
|       |        | Additive            | Dominance | Maternal    | Residual    | Phenotypic  | h <sup>2</sup> | d <sup>2</sup> | m <sup>2</sup> |
| FW    | A      | 503 [155]           | -         | -           | 626 [77]    | 1129 [85]   | 0.45 [0.11]    | -              | -              |
|       | AD     | 425 [180]           | 126 [138] | -           | 575 [94]    | 1126 [8]    | 0.38 [0.14]    | 0.11 [0.12]    | -              |
|       | ADM    | 0 [0]               | 152 [71]  | 119 [53]    | 755 [54]    | 1027 [60]   | 0 [0]          | 0.15 [0.07]    | 0.12 [0.05]    |
|       | AM     | 104 [56]            | -         | 116 [52]    | 812 [36]    | 1033 [61]   | 0.10 [0.05]    | -              | 0.11 [0.05]    |
|       | A*     | 470 [145]           |           |             | 627 [77]    | 1098 [76]   | 0.43 [0.1]     |                |                |
|       | A*D*   | 413 [161]           | 111 [121] |             | 568 [99]    | 1091 [77]   | 0.38 [0.12]    | 0.10 [0.11]    |                |
|       | A*D*M* | 11 [93]             | 142 [127] | 119 [53]    | 743 [71]    | 1015 [62]   | 0.01 [0.09]    | 0.14 [0.13]    | 0.12 [0.05]    |
|       | A*M*   | 98 [53]             |           | 116 [52]    | 812 [36]    | 1026 [61]   | 0.10 [0.05]    |                | 0.11 [0.05]    |
|       | S      | 235 [73]            |           |             | 862 [25]    | 980 [43]    | 0.24 [0.07]    |                |                |
|       | SF     | 234 [73]            | 28 [30]   |             | 857 [25]    | 981 [44]    | 0.24 [0.07]    | 0.03 [0.03]    |                |
|       | SFM    | 41 [26]             | 36 [32]   | 120 [53]    | 855 [25]    | 1003 [58]   | 0.04 [0.03]    | 0.04 [0.03]    | 0.12 [0.05]    |
|       | SM     | 49 [26]             |           | 116 [53]    | 861 [24]    | 1002 [58]   | 0.05 [0.03]    |                | 0.12 [0.05]    |
| FY    | A      | 2.28 [0.76]         | -         | -           | 7.34 [0.44] | 9.63 [0.46] | 0.24 [0.07]    | -              | -              |
|       | AD     | 2.28 [0.76]         | 0 [0]     | -           | 7.34 [0.44] | 9.63 [0.46] | 0.24 [0.07]    | 0 [0]          | -              |
|       | ADM    | 2.11 [0.94]         | 0 [0]     | 0.05 [0.18] | 7.42 [0.51] | 9.58 [0.48] | 0.22 [0.09]    | 0 [0]          | 0.01 [0.02]    |
|       | AM     | 2.11 [0.94]         | -         | 0.05 [0.18] | 7.42 [0.51] | 9.58 [0.48] | 0.22 [0.09]    | -              | 0.01 [0.02]    |
|       | A*     | 2.13 [0.71]         |           |             | 7.35 [0.43] | 9.48 [0.42] | 0.23 [0.07]    |                |                |
|       | A*D*   | 2.13 [0.71]         | 0 [0]     |             | 7.35 [0.43] | 9.48 [0.42] | 0.23 [0.07]    | 0 [0]          |                |
|       | A*D*M* | 1.97 [0.88]         | 0 [0]     | 0.05 [0.18] | 7.43 [0.5]  | 9.45 [0.43] | 0.21 [0.09]    | 0 [0]          | 0.01 [0.02]    |
|       | A*M*   | 1.97 [0.88]         |           | 0.05 [0.18] | 7.43 [0.5]  | 9.45 [0.43] | 0.21 [0.09]    |                | 0.01 [0.02]    |
|       | S      | 1.07 [0.36]         |           |             | 8.41 [0.24] | 8.95 [0.29] | 0.12 [0.04]    |                |                |
|       | SF     | 1.07 [0.36]         | 0 [0]     |             | 8.41 [0.24] | 8.95 [0.29] | 0.12 [0.04]    | 0 [0]          |                |
|       | SFM    | 0.98 [0.44]         | 0 [0]     | 0.05 [0.19] | 8.41 [0.24] | 8.96 [0.3]  | 0.11 [0.05]    | 0 [0]          | 0.01 [0.02]    |
|       | SM     | 0.98 [0.44]         |           | 0.05 [0.19] | 8.41 [0.24] | 8.96 [0.3]  | 0.11 [0.05]    |                | 0.01 [0.02]    |
